# Supplementary material for: New records of a critically endangered shrew from Mexican cloud forests (Soricidae, Cryptotis nelsoni) and prospects for future field research
Source: Biodivers Data J. 2018 Aug 14;(6):e26667. doi: 10.3897/BDJ.6.e26667 (PMC6160866; doi:10.3897/BDJ.6.e26667)
Supplement: Supplementary material 3 — Occurrence data of the Nelson´s small-eared shrew, Cryptotis nelsoni [file bdj-06-e26667-s003.xls]

## Sheet: Hoja1
InstitutionCode	CollectionCode	basisOfRecord	catalogueNumber	recordedBy	year	month	day	country	stateProvince	municipality	locality	decimalLatitude	decimalLongitude	typeStatus	scientificName	scientificNameAuthorship
IBUNAM	CNMA	Preserved	41956	Lázaro Guevara, Cervantes R., F. A.	2003	11	1	México	Veracruz	San Andrés Tuxtla	Volcán San Martín Tuxtla. Ejido Campeche, 11 km N San Andrés Tuxtla	18.5478	-95.1917	NA	Cryptotis nelsoni	(Merriam, 1895)
IBUNAM	CNMA	Preserved	41957	Lázaro Guevara, Cervantes R., F. A.	2003	11	1	México	Veracruz	San Andrés Tuxtla	Volcán San Martín Tuxtla. Ejido Campeche, 11 km N San Andrés Tuxtla	18.5478	-95.1917	NA	Cryptotis nelsoni	(Merriam, 1895)
IBUNAM	CNMA	Preserved	41958	Lázaro Guevara, Cervantes R., F. A.	2003	11	1	México	Veracruz	San Andrés Tuxtla	Volcán San Martín Tuxtla. Ejido Campeche, 11 km N San Andrés Tuxtla	18.5478	-95.1917	NA	Cryptotis nelsoni	(Merriam, 1895)
IBUNAM	CNMA	Preserved	41959	Lázaro Guevara, Cervantes R., F. A.	2003	11	1	México	Veracruz	San Andrés Tuxtla	Volcán San Martín Tuxtla. Ejido Campeche, 11 km N San Andrés Tuxtla	18.5478	-95.1917	NA	Cryptotis nelsoni	(Merriam, 1895)
IBUNAM	CNMA	Preserved	41960	Lázaro Guevara, Cervantes R., F. A.	2003	11	1	México	Veracruz	San Andrés Tuxtla	Volcán San Martín Tuxtla. Ejido Campeche, 11 km N San Andrés Tuxtla	18.5478	-95.1917	NA	Cryptotis nelsoni	(Merriam, 1895)
IBUNAM	CNMA	Preserved	41961	Lázaro Guevara, Cervantes R., F. A.	2003	11	1	México	Veracruz	San Andrés Tuxtla	Volcán San Martín Tuxtla. Ejido Campeche, 11 km N San Andrés Tuxtla	18.5478	-95.1917	NA	Cryptotis nelsoni	(Merriam, 1895)
IBUNAM	CNMA	Preserved	41962	Lázaro Guevara, Cervantes R., F. A.	2003	11	1	México	Veracruz	San Andrés Tuxtla	Volcán San Martín Tuxtla. Ejido Campeche, 11.5 km N San Andrés Tuxtla	18.5511	-95.1953	NA	Cryptotis nelsoni	(Merriam, 1895)
IBUNAM	CNMA	Preserved	41963	Lázaro Guevara, Cervantes R., F. A.	2003	11	1	México	Veracruz	San Andrés Tuxtla	Volcán San Martín Tuxtla. Ejido Campeche, 11.5 km N San Andrés Tuxtla	18.5511	-95.1953	NA	Cryptotis nelsoni	(Merriam, 1895)
IBUNAM	CNMA	Preserved	41964	Lázaro Guevara, Cervantes R., F. A.	2003	11	1	México	Veracruz	San Andrés Tuxtla	Volcán San Martín Tuxtla. Ejido Campeche, 11.5 km N San Andrés Tuxtla	18.5511	-95.1953	NA	Cryptotis nelsoni	(Merriam, 1895)
IBUNAM	CNMA	Preserved	41965	Lázaro Guevara, Cervantes R., F. A.	2003	11	1	México	Veracruz	San Andrés Tuxtla	Volcán San Martín Tuxtla. Ejido Campeche, 11.5 km N San Andrés Tuxtla	18.5511	-95.1953	NA	Cryptotis nelsoni	(Merriam, 1895)
IBUNAM	CNMA	Preserved	41966	Lázaro Guevara, Cervantes R., F. A.	2003	11	1	México	Veracruz	San Andrés Tuxtla	Volcán San Martín Tuxtla. Ejido Campeche, 11.5 km N San Andrés Tuxtla	18.5511	-95.1953	NA	Cryptotis nelsoni	(Merriam, 1895)
IBUNAM	CNMA	Preserved	41967	Lázaro Guevara, Cervantes R., F. A.	2003	11	1	México	Veracruz	San Andrés Tuxtla	Volcán San Martín Tuxtla. Ejido Campeche, 11.5 km N San Andrés Tuxtla	18.5511	-95.1953	NA	Cryptotis nelsoni	(Merriam, 1895)
IBUNAM	CNMA	Preserved	41968	Lázaro Guevara, Cervantes R., F. A.	2003	11	1	México	Veracruz	San Andrés Tuxtla	Volcán San Martín Tuxtla. Ejido Campeche, 11.5 km N San Andrés Tuxtla	18.5511	-95.1953	NA	Cryptotis nelsoni	(Merriam, 1895)
IBUNAM	CNMA	Preserved	41969	Lázaro Guevara, Cervantes R., F. A.	2003	11	1	México	Veracruz	San Andrés Tuxtla	Volcán San Martín Tuxtla. Ejido Campeche, 11.5 km N San Andrés Tuxtla	18.5511	-95.1953	NA	Cryptotis nelsoni	(Merriam, 1895)
IBUNAM	CNMA	Preserved	41970	Lázaro Guevara, Cervantes R., F. A.	2003	11	1	México	Veracruz	San Andrés Tuxtla	Volcán San Martín Tuxtla. Ejido Campeche, 11.5 km N San Andrés Tuxtla	18.5511	-95.1953	NA	Cryptotis nelsoni	(Merriam, 1895)
IBUNAM	CNMA	Preserved	41971	Lázaro Guevara, Cervantes R., F. A.	2003	11	1	México	Veracruz	San Andrés Tuxtla	Volcán San Martín Tuxtla. Ejido Campeche, 11.5 km N San Andrés Tuxtla	18.5511	-95.1953	NA	Cryptotis nelsoni	(Merriam, 1895)
IBUNAM	CNMA	Preserved	41972	Lázaro Guevara, Cervantes R., F. A.	2003	11	1	México	Veracruz	San Andrés Tuxtla	Volcán San Martín Tuxtla. Ejido Campeche, 11.5 km N San Andrés Tuxtla	18.5511	-95.1953	NA	Cryptotis nelsoni	(Merriam, 1895)
IBUNAM	CNMA	Preserved	41973	Lázaro Guevara, Cervantes R., F. A.	2003	11	1	México	Veracruz	San Andrés Tuxtla	Volcán San Martín Tuxtla. Ejido Campeche, 11.5 km N San Andrés Tuxtla	18.5511	-95.1953	NA	Cryptotis nelsoni	(Merriam, 1895)
IBUNAM	CNMA	Preserved	41974	Lázaro Guevara, Cervantes R., F. A.	2003	11	1	México	Veracruz	San Andrés Tuxtla	Volcán San Martín Tuxtla. Ejido Campeche, 11.5 km N San Andrés Tuxtla	18.5511	-95.1953	NA	Cryptotis nelsoni	(Merriam, 1895)
IBUNAM	CNMA	Preserved	41975	Lázaro Guevara, Cervantes R., F. A.	2003	11	1	México	Veracruz	San Andrés Tuxtla	Volcán San Martín Tuxtla. Ejido Campeche, 11.5 km N San Andrés Tuxtla	18.5511	-95.1953	NA	Cryptotis nelsoni	(Merriam, 1895)
IBUNAM	CNMA	Preserved	41976	Lázaro Guevara, Cervantes R., F. A.	2003	11	1	México	Veracruz	San Andrés Tuxtla	Volcán San Martín Tuxtla. Ejido Campeche, 11.5 km N San Andrés Tuxtla	18.5511	-95.1953	NA	Cryptotis nelsoni	(Merriam, 1895)
IBUNAM	CNMA	Preserved	41977	Lázaro Guevara, Cervantes R., F. A.	2003	11	1	México	Veracruz	San Andrés Tuxtla	Volcán San Martín Tuxtla. Ejido Campeche, 11.5 km N San Andrés Tuxtla	18.5511	-95.1953	NA	Cryptotis nelsoni	(Merriam, 1895)
IBUNAM	CNMA	Preserved	41978	Lázaro Guevara, Cervantes R., F. A.	2003	11	1	México	Veracruz	San Andrés Tuxtla	Volcán San Martín Tuxtla. Ejido Campeche, 11.5 km N San Andrés Tuxtla	18.5511	-95.1953	NA	Cryptotis nelsoni	(Merriam, 1895)
IBUNAM	CNMA	Preserved	41979	Lázaro Guevara, Cervantes R., F. A.	2003	11	1	México	Veracruz	San Andrés Tuxtla	Volcán San Martín Tuxtla. Ejido Campeche, 11.5 km N San Andrés Tuxtla	18.5511	-95.1953	NA	Cryptotis nelsoni	(Merriam, 1895)
IBUNAM	CNMA	Preserved	41981	Lázaro Guevara, Cervantes R., F. A.	2004	2	13	México	Veracruz	San Andrés Tuxtla	Volcán San Martín Tuxtla. Ejido Campeche, 11 km N San Andrés Tuxtla	18.5478	-95.1917	NA	Cryptotis nelsoni	(Merriam, 1895)
IBUNAM	CNMA	Preserved	41982	Lázaro Guevara, Cervantes R., F. A.	2004	2	13	México	Veracruz	San Andrés Tuxtla	Volcán San Martín Tuxtla. Ejido Campeche, 11 km N San Andrés Tuxtla	18.5478	-95.1917	NA	Cryptotis nelsoni	(Merriam, 1895)
IBUNAM	CNMA	Preserved	41983	Lázaro Guevara, Cervantes R., F. A.	2004	2	13	México	Veracruz	San Andrés Tuxtla	Volcán San Martín Tuxtla. Ejido Campeche, 11 km N San Andrés Tuxtla	18.5478	-95.1917	NA	Cryptotis nelsoni	(Merriam, 1895)
IBUNAM	CNMA	Preserved	41984	Lázaro Guevara, Cervantes R., F. A.	2004	2	13	México	Veracruz	San Andrés Tuxtla	Volcán San Martín Tuxtla. Ejido Campeche, 11 km N San Andrés Tuxtla	18.5478	-95.1917	NA	Cryptotis nelsoni	(Merriam, 1895)
IBUNAM	CNMA	Preserved	41985	Lázaro Guevara, Cervantes R., F. A.	2004	2	13	México	Veracruz	San Andrés Tuxtla	Volcán San Martín Tuxtla. Ejido Campeche, 11 km N San Andrés Tuxtla	18.5478	-95.1917	NA	Cryptotis nelsoni	(Merriam, 1895)
IBUNAM	CNMA	Preserved	41986	Lázaro Guevara, Cervantes R., F. A.	2004	2	13	México	Veracruz	San Andrés Tuxtla	Volcán San Martín Tuxtla. Ejido Campeche, 11 km N San Andrés Tuxtla	18.5478	-95.1917	NA	Cryptotis nelsoni	(Merriam, 1895)
IBUNAM	CNMA	Preserved	41987	Lázaro Guevara, Cervantes R., F. A.	2004	2	13	México	Veracruz	San Andrés Tuxtla	Volcán San Martín Tuxtla. Ejido Campeche, 11 km N San Andrés Tuxtla	18.5478	-95.1917	NA	Cryptotis nelsoni	(Merriam, 1895)
IBUNAM	CNMA	Preserved	41988	Lázaro Guevara, Cervantes R., F. A.	2004	2	13	México	Veracruz	San Andrés Tuxtla	Volcán San Martín Tuxtla. Ejido Campeche, 11 km N San Andrés Tuxtla	18.5478	-95.1917	NA	Cryptotis nelsoni	(Merriam, 1895)
IBUNAM	CNMA	Preserved	41989	Lázaro Guevara, Cervantes R., F. A.	2004	2	13	México	Veracruz	San Andrés Tuxtla	Volcán San Martín Tuxtla. Ejido Campeche, 11 km N San Andrés Tuxtla	18.5478	-95.1917	NA	Cryptotis nelsoni	(Merriam, 1895)
IBUNAM	CNMA	Preserved	41990	Lázaro Guevara, Cervantes R., F. A.	2004	2	13	México	Veracruz	San Andrés Tuxtla	Volcán San Martín Tuxtla. Ejido Campeche, 11 km N San Andrés Tuxtla	18.5478	-95.1917	NA	Cryptotis nelsoni	(Merriam, 1895)
IBUNAM	CNMA	Preserved	41991	Lázaro Guevara, Cervantes R., F. A.	2004	2	13	México	Veracruz	San Andrés Tuxtla	Volcán San Martín Tuxtla. Ejido Campeche, 11 km N San Andrés Tuxtla	18.5478	-95.1917	NA	Cryptotis nelsoni	(Merriam, 1895)
IBUNAM	CNMA	Preserved	41992	Lázaro Guevara, Cervantes R., F. A.	2004	2	13	México	Veracruz	San Andrés Tuxtla	Volcán San Martín Tuxtla. Ejido Campeche, 11 km N San Andrés Tuxtla	18.5478	-95.1917	NA	Cryptotis nelsoni	(Merriam, 1895)
IBUNAM	CNMA	Preserved	41993	Lázaro Guevara, Cervantes R., F. A.	2004	2	13	México	Veracruz	San Andrés Tuxtla	Volcán San Martín Tuxtla. Ejido Campeche, 11 km N San Andrés Tuxtla	18.5478	-95.1917	NA	Cryptotis nelsoni	(Merriam, 1895)
IBUNAM	CNMA	Preserved	41994	Lázaro Guevara, Cervantes R., F. A.	2004	3	20	México	Veracruz	San Andrés Tuxtla	Volcán San Martín Tuxtla. Ejido Campeche, 11.5 km N, 2 km E San Andrés Tuxtla	18.5542	-95.1916	NA	Cryptotis nelsoni	(Merriam, 1895)
IBUNAM	CNMA	Preserved	41995	Lázaro Guevara, Cervantes R., F. A.	2004	3	20	México	Veracruz	San Andrés Tuxtla	Volcán San Martín Tuxtla. Ejido Campeche, 11.75 km N, 2.5 km E San Andrés Tuxtla	18.5394	-95.1923	NA	Cryptotis nelsoni	(Merriam, 1895)
IBUNAM	CNMA	Preserved	41996	Lázaro Guevara, Cervantes R., F. A.	2004	3	20	México	Veracruz	San Andrés Tuxtla	Volcán San Martín Tuxtla. Ejido Campeche, 11.75 km N, 2.5 km E San Andrés Tuxtla	18.5394	-95.1923	NA	Cryptotis nelsoni	(Merriam, 1895)
IBUNAM	CNMA	Preserved	41997	Lázaro Guevara, Cervantes R., F. A.	2004	3	21	México	Veracruz	San Andrés Tuxtla	Volcán San Martín Tuxtla. Ejido Campeche, 11.75 km N, 2.5 km E San Andrés Tuxtla	18.5394	-95.1923	NA	Cryptotis nelsoni	(Merriam, 1895)
IBUNAM	CNMA	Preserved	41998	Lázaro Guevara, Cervantes R., F. A.	2004	3	21	México	Veracruz	San Andrés Tuxtla	Volcán San Martín Tuxtla. Ejido Campeche, 11.75 km N, 2.5 km E San Andrés Tuxtla	18.5394	-95.1923	NA	Cryptotis nelsoni	(Merriam, 1895)
IBUNAM	CNMA	Preserved	41999	Lázaro Guevara, Cervantes R., F. A.	2004	3	20	México	Veracruz	San Andrés Tuxtla	Volcán San Martín Tuxtla. Ejido Campeche, 11.5 km N, 2 km E San Andrés Tuxtla	18.5542	-95.1916	NA	Cryptotis nelsoni	(Merriam, 1895)
IBUNAM	CNMA	Preserved	42000	Lázaro Guevara, Cervantes R., F. A.	2004	3	20	México	Veracruz	San Andrés Tuxtla	Volcán San Martín Tuxtla. Ejido Campeche, 11.5 km N, 2 km E San Andrés Tuxtla	18.5542	-95.1916	NA	Cryptotis nelsoni	(Merriam, 1895)
IBUNAM	CNMA	Preserved	42001	Lázaro Guevara, Cervantes R., F. A.	2004	3	20	México	Veracruz	San Andrés Tuxtla	Volcán San Martín Tuxtla. Ejido Campeche, 11.75 km N, 2.5 km E San Andrés Tuxtla	18.5394	-95.1923	NA	Cryptotis nelsoni	(Merriam, 1895)
IBUNAM	CNMA	Preserved	42276	Lázaro Guevara, Cervantes R., F. A.	2003	11	1	México	Veracruz	San Andrés Tuxtla	Volcán San Martín Tuxtla. Ejido Campeche, 11.5 km N San Andrés Tuxtla	18.5511	-95.1953	NA	Cryptotis nelsoni	(Merriam, 1895)
IBUNAM	CNMA	Preserved	42277	Lázaro Guevara, Cervantes R., F. A.	2003	11	1	México	Veracruz	San Andrés Tuxtla	Volcán San Martín Tuxtla. Ejido Campeche, 11.5 km N San Andrés Tuxtla	18.5511	-95.1953	NA	Cryptotis nelsoni	(Merriam, 1895)
IBUNAM	CNMA	Preserved	49294	Lázaro Guevara	2015	9	15	México	Veracruz	San Andrés Tuxtla	Volcán San Martín Tuxtla, 12.5 km N San Andrés Tuxtla	18.565	-95.186	NA	Cryptotis nelsoni	(Merriam, 1895)
IBUNAM	CNMA	Preserved	49295	Lázaro Guevara	2015	9	15	México	Veracruz	San Andrés Tuxtla	Volcán San Martín Tuxtla, 12.5 km N San Andrés Tuxtla	18.565	-95.186	NA	Cryptotis nelsoni	(Merriam, 1895)
IBUNAM	CNMA	Preserved	49296	Lázaro Guevara	2015	9	15	México	Veracruz	San Andrés Tuxtla	Volcán San Martín Tuxtla, 12.5 km N San Andrés Tuxtla	18.565	-95.186	NA	Cryptotis nelsoni	(Merriam, 1895)
IBUNAM	CNMA	Preserved	49297	Lázaro Guevara	2015	9	15	México	Veracruz	San Andrés Tuxtla	Volcán San Martín Tuxtla, 12.5 km N San Andrés Tuxtla	18.565	-95.186	NA	Cryptotis nelsoni	(Merriam, 1895)
IBUNAM	CNMA	Preserved	49289	Lázaro Guevara	2015	9	15	México	Veracruz	San Andrés Tuxtla	Volcán San Martín Tuxtla, 13.5 km N San Andrés Tuxtla	18.5576	-95.1899	NA	Cryptotis nelsoni	(Merriam, 1895)
IBUNAM	CNMA	Preserved	49290	Lázaro Guevara	2015	9	15	México	Veracruz	San Andrés Tuxtla	Volcán San Martín Tuxtla, 13.5 km N San Andrés Tuxtla	18.5576	-95.1899	NA	Cryptotis nelsoni	(Merriam, 1895)
IBUNAM	CNMA	Preserved	49291	Lázaro Guevara	2015	9	15	México	Veracruz	San Andrés Tuxtla	Volcán San Martín Tuxtla, 13.5 km N San Andrés Tuxtla	18.5576	-95.1899	NA	Cryptotis nelsoni	(Merriam, 1895)
IBUNAM	CNMA	Preserved	49292	Lázaro Guevara	2015	9	15	México	Veracruz	San Andrés Tuxtla	Volcán San Martín Tuxtla, 13.5 km N San Andrés Tuxtla	18.5576	-95.1899	NA	Cryptotis nelsoni	(Merriam, 1895)
IBUNAM	CNMA	Preserved	49293	Lázaro Guevara	2015	9	15	México	Veracruz	San Andrés Tuxtla	Volcán San Martín Tuxtla, 13.5 km N San Andrés Tuxtla	18.5576	-95.1899	NA	Cryptotis nelsoni	(Merriam, 1895)
IBUNAM	CNMA	Preserved	49298	Lázaro Guevara	2015	9	16	México	Veracruz	San Andrés Tuxtla	Cerro Mastagaga, 11 km NE San Andrés Tuxtla	18.5226	-95.1419	NA	Cryptotis nelsoni	(Merriam, 1895)
IBUNAM	CNMA	Preserved	49299	Lázaro Guevara	2015	9	16	México	Veracruz	San Andrés Tuxtla	Cerro Mastagaga, 11 km NE San Andrés Tuxtla	18.5226	-95.1419	NA	Cryptotis nelsoni	(Merriam, 1895)
IBUNAM	CNMA	Preserved	49300	Lázaro Guevara	2015	9	16	México	Veracruz	San Andrés Tuxtla	Cerro Mastagaga, 11 km NE San Andrés Tuxtla	18.5226	-95.1419	NA	Cryptotis nelsoni	(Merriam, 1895)
IBUNAM	CNMA	Preserved	49301	Lázaro Guevara	2015	9	16	México	Veracruz	San Andrés Tuxtla	Cerro Mastagaga, 11 km NE San Andrés Tuxtla	18.5226	-95.1419	NA	Cryptotis nelsoni	(Merriam, 1895)
IBUNAM	CNMA	Preserved	49302	Lázaro Guevara	2015	9	16	México	Veracruz	San Andrés Tuxtla	Cerro Mastagaga, 11 km NE San Andrés Tuxtla	18.5226	-95.1419	NA	Cryptotis nelsoni	(Merriam, 1895)
IBUNAM	CNMA	Preserved	40303	Lázaro Guevara	2015	9	16	México	Veracruz	San Andrés Tuxtla	Cerro Mastagaga, 11 km NE San Andrés Tuxtla	18.5226	-95.1419	NA	Cryptotis nelsoni	(Merriam, 1895)
